# Supplementary material for: Molecular Cloning and Characterization of a meta/para-O-Methyltransferase from Lycoris aurea
Source: PubMed Central journal article supplement (PMC6073595; doi:10.3390/ijms19071911), 2018-06-29

## Supplementary Materials:

**Table S1.** The list of primers used in this study.

| Gene name      | Species<br>(GenBank)       | Primer sequences (5'→3')                                                                           | Usage                                                  |
|----------------|----------------------------|----------------------------------------------------------------------------------------------------|--------------------------------------------------------|
| <i>LaOMT1</i>  | <i>L. aurea</i>            | P1: 5'-ATGATGGGTGCTAGCCAAGATGATTATG-3'<br>P2: 5'-TTATCAATAAAGACGTCGACAAATAGTCA-3'                  | <i>LaOMT1</i> ORF<br>amplification                     |
| <i>LaOMT1</i>  | <i>L. aurea</i>            | P3: 5'-CAGCCATATGATGGGTGCTAGCCAAGATGATTATG-3'<br>P4: 5'-CGCACTCGAGTCAATAAAGACGTCGACAAATAGTCAGTC-3' | <i>LaOMT1</i> protein<br>expressions in <i>E. coli</i> |
| <i>LaOMT1</i>  | <i>L. aurea</i>            | P5: CAGCTCTAGAATGGGTGCTAGCCAAGATGATTATG-3'<br>P6: CGCAGGATCCATAAAGACGTCGACAAATAGTCAGTC-3'          | Subcellular localization                               |
| <i>LaOMT1</i>  | <i>L. aurea</i>            | P7: 5'-CAACACGCTCTGGTTCGGAAC-3'<br>P8: 5'-CGACTGAGACTTGGGATATC-3'                                  | qRT-PCR analysis                                       |
| <i>LaTIP41</i> | <i>L. aurea</i>            | P9: 5'-GCAACCATCCAAAAGTTAACTGCT-3'<br>P10: 5'-AATGTGCAAGCAGGGCTAGTAA-3'                            | Reference gene for<br>qRT-PCR analysis                 |
| <i>LaEXP1</i>  | <i>L. aurea</i>            | P11: 5'- ATTGAAACAACCTACACCGCAA-3'<br>P12: 5'- GCTGTAAGAATGCTAATCGTTCA-3'                          | Reference gene for<br>qRT-PCR analysis                 |
| <i>AtPEX7</i>  | Arabidopsis<br>(At1g29260) | P13: 5'-CGCTTCTAGAATGCCGGTGTTCAAAGCTCC-3'<br>P14: 5'-AATCCCCGGGACTGGCTCTAGGATCCATCCC-3'            | Subcellular localization<br>for marker protein         |
| <i>AtGAPC1</i> | Arabidopsis<br>(At3g04120) | P15: 5'-CGCTTCTAGAATGGCTGACAAGAAGATTAG-3'<br>P16: 5'-AATCCCCGGGGCCCTTTGACATGTGGACGAT-3'            | Subcellular localization<br>for marker protein         |
| <i>AtAra6</i>  | Arabidopsis<br>(At3g54840) | P17: 5'-CGCTTCTAGAATGGGATGTGCTTCTCTCTT-3'<br>P18: 5'-AATCCCCGGGTGACGAAGGAGCAGGACGAGGT-3'           | Subcellular localization<br>for marker protein         |

**Table S2.** GenBank accession numbers of OMT proteins in Fig. 1

| Protein names | Species                                   | Accession number           | Class type |
|---------------|-------------------------------------------|----------------------------|------------|
| LaOMT         | <i>Lycoris aurea</i>                      |                            | I          |
| AtCOMT        | <i>Arabidopsis thaliana</i>               | NP_200227.1<br>(At5g54160) | II         |
| AtCCoAOMT7    | <i>Arabidopsis thaliana</i>               | NP_567739.1<br>(At4g26220) | I          |
| Cr16OMT       | <i>Catharanthus roseus</i>                | ABR20103.1                 | II         |
| CrF4OMT       | <i>Catharanthus roseus</i>                | AAR02420.1                 | II         |
| CiOMT2        | <i>Carapichea ipecacuanha</i>             | BAI79244.1                 | II         |
| CaCOMT        | <i>Chrysosplenium americanum</i>          | AAA86982.1                 | II         |
| Cj4OMT        | <i>Coptis japonica</i>                    | BAB08005.1                 | II         |
| Cj6OMT        | <i>Coptis japonica</i>                    | BAB08004.1                 | II         |
| CjCoOMT       | <i>Coptis japonica</i>                    | BAC22084.1                 | II         |
| HsOMT         | <i>Homo sapiens</i>                       | NP_000745.1                | I          |
| HvF7OMT       | <i>Hordeum vulgare subsp. vulgare</i>     | CAA54616.1                 | II         |
| Ms7OMT        | <i>Medicago sativa</i>                    | AAC49927.1                 | II         |
| MsCCoAOMT     | <i>Medicago sativa</i>                    | AAC28973.1                 | I          |
| MxSafC        | <i>Myxococcus xanthus</i>                 | AAC44130.1                 | I          |
| NpN4OMT       | <i>Narcissus sp. aff. Pseudonarcissus</i> | AIL54541.1                 | I          |
| NtCOMT        | <i>Nicotiana tabacum</i>                  | CAA50561.1                 | II         |
| ObEOMT1       | <i>Ocimum basilicum</i>                   | AAL30424.1                 | II         |
| OsCOMT        | <i>Oryza sativa</i>                       | Os08g0157500               | II         |
| Ps7OMT        | <i>Papaver somniferum</i>                 | ACN88562.1                 | II         |
| Ps4OMT1       | <i>Papaver somniferum</i>                 | AAP45313.1                 | II         |
| Ps4OMT2       | <i>Papaver somniferum</i>                 | AAP45314.1                 | II         |
| PtCCoAOMT     | <i>Populus tremuloides</i>                | AAA80651.1                 | I          |
| PdOMT         | <i>Prunus dulcis</i>                      | CAA11131.1                 | II         |
| PfOMT         | <i>Mesembryanthemum crystallinum</i>      | AY14552.1                  | II         |
| PpOMT         | <i>Pyrus pyrifolia</i>                    | BAA86059.1                 | II         |
| RnOMT         | <i>Rattus norvegicus</i>                  | NP_036663.1                | I          |
| SlAnthOMT     | <i>Solanum lycopersicum</i>               | NP_001289828.1             | I          |
| SbCCoAOMT     | <i>Sorghum bicolor</i>                    | XP_002436550               | I          |
| SynOMT        | <i>Synechocystis sp. Strain PCC 6803</i>  | WP_010873795.1             | I          |
| TtCOMT        | <i>Thalictrum tuberosum</i>               | AAD29842.1                 | II         |
| Tf4OMT        | <i>Thalictrum flavum subsp. glaucum</i>   | AAU20768.1                 | II         |
| VpCOMT        | <i>Vanilla planifolia</i>                 | AAS64572.1                 | II         |
| VpOMT5        | <i>Vanilla planifolia</i>                 | ADZ76154.1                 | I          |
| VpOMT4        | <i>Vanilla planifolia</i>                 | ADZ76153.1                 | I          |
| VvCCoAOMT     | <i>Vitis vinifera</i>                     | CAA90969.1                 | I          |
| VvFAOMT       | <i>Vitis vinifera</i>                     | C7AE94.1                   | I          |
| ZmCOMT        | <i>Zea mays</i>                           | AAB03364.1                 | II         |
| ZvCOMT        | <i>Zinnia violacea</i>                    | AAA86718.1                 | II         |
| ZvCCoAOMT     | <i>Zinnia violacea</i>                    | AAA59389.1                 | I          |

**Figure S1.** Nucleotide and predicted protein sequence of LaOMT1.

```
1      ATGGGTGCTAGCCAAGATGATTATGCACTAATCCACAAGAATATTTTGCATAGTGAAGAT
1      M G A S Q D D Y A L I H K N I L H S E D
61     CTTCTTAAGTACATATTGGAGACTAGTGTTTACCCAAGAGAGCATGAACAGCTCAAGGGG
21     L L K Y I L E T S V Y P R E H E Q L K G
121    TTGAGGGAGGTGACTGAGAAACATGAATGGAGTACGGCGCTTGTCGCAGCCGATGAAGGA
41     L R E V T E K H E W S T A L V A A D E G
181    TTATTTCTTTCTATGTTGTTAAAGCTCATGAATGCCAAGAGAACCATTGAGATTGGTGTA
61     L F L S M L L K L M N A K R T I E I G V
241    TACACGGTTATTCTCTGCTCACAACCGCTTTGGCTTTACCAGAAGATGGAAAGATAACG
81     Y T G Y S L L T T A L A L P E D G K I T
301    GCAATTGACGTCAACAAGTCCTACTTTGAGATAGGACTGCCATTTATTTCAGAAAGCAGGA
101    A I D V N K S Y F E I G L P F I Q K A G
361    GTTGAGCATAAGATCAATTTTCATTGAATCAGAAGCACTTCCTGTTCTTGATCATATGCTT
121    V E H K I N F I E S E A L P V L D H M L
421    CAAGAGATGAAGGAAGAAGACCTCTACGACTTTGCATTTGTTCGATGCAGACAAACCAAAC
141    Q E M K E E D L Y D F A F V D A D K P N
481    TATGCTAATTACCACGAGCGATTAGTGAAGCTTGTTCAGGGTTGGAGGAGCAATCGTCTAC
161    Y A N Y H E R L V K L V R V G G A I V Y
541    GACAACACGCTCTGGTTCGGAAGTGTAGCATTTCAGAAATATCCAGGCCTTCATCCAGAA
181    D N T L W F G T V A F P E Y P G L H P E
601    GAGGAGGAGTGTAGGTCTCTTTCAGAAACCTGAATAAGCTCTTGGCAGCTGATCCCCGT
201    E E E C R V S F R N L N K L L A A D P R
661    GTCGAGATATCCCAAGTCTCAGTCGGCGATGGACTGACTATTTGTCGACGTCTTTATTGA
221    V E I S Q V S V G D G L T I C R R L Y *
```

**Figure S2.** Expression and purification of N-terminal 6 × histidine-tagged LaOMT1 protein. *E. coli* BL21 (DE3) harbouring pET-28a or pET28a-LaOMT1 was incubated with or without 1 mM IPTG (isopropyl-β-d-thiogalactopyranoside) at 30 °C for 16 h. Protein samples were separated on a 10% SDS-PAGE followed by Coomassie blue staining. M, molecular mass standards; lane 1, total proteins in 20-μl aliquots from *E. coli* BL21 culture harboring pET28a; lane 2, total proteins in 20-μl aliquots from *E. coli* BL21 culture harboring pET28a induced by IPTG; lane 3, total proteins in 20-μl aliquots from *E. coli* BL21 culture harboring pET28a-LaOMT1; lane 4, total proteins in 20-μl aliquots from *E. coli* BL21 culture harboring pET28a-LaOMT1 induced by IPTG; lane 5, 10 μg recombinant LaCOMT1 protein purified by affinity chromatography. Arrow indicates the position of the fusion protein of LaOMT1.

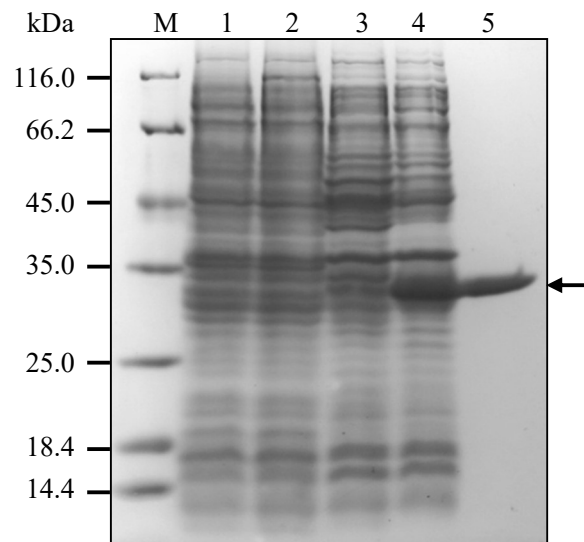

**Figure S3.** Mass spectrometry (MS) of new compounds produced by LaOMT1 enzyme in catalyzing the substrate caffeic acid (A), 3,4-dihydroxybenzaldehyde (B), and noberrilladine (C). 1, substrate caffeic acid; 2, ferulic acid produced by LaOMT1; 3, isoferulic acid produced by LaOMT1; 4, substrate 3,4-dihydroxybenzaldehyde; 5, isovanillin produced by LaOMT1; 6, vanillin produced by LaOMT1; 7, substrate noberrilladine; 8, 4'-*O*-methylnoberrilladine; 9, 3'-*O*-methylnoberrilladine.

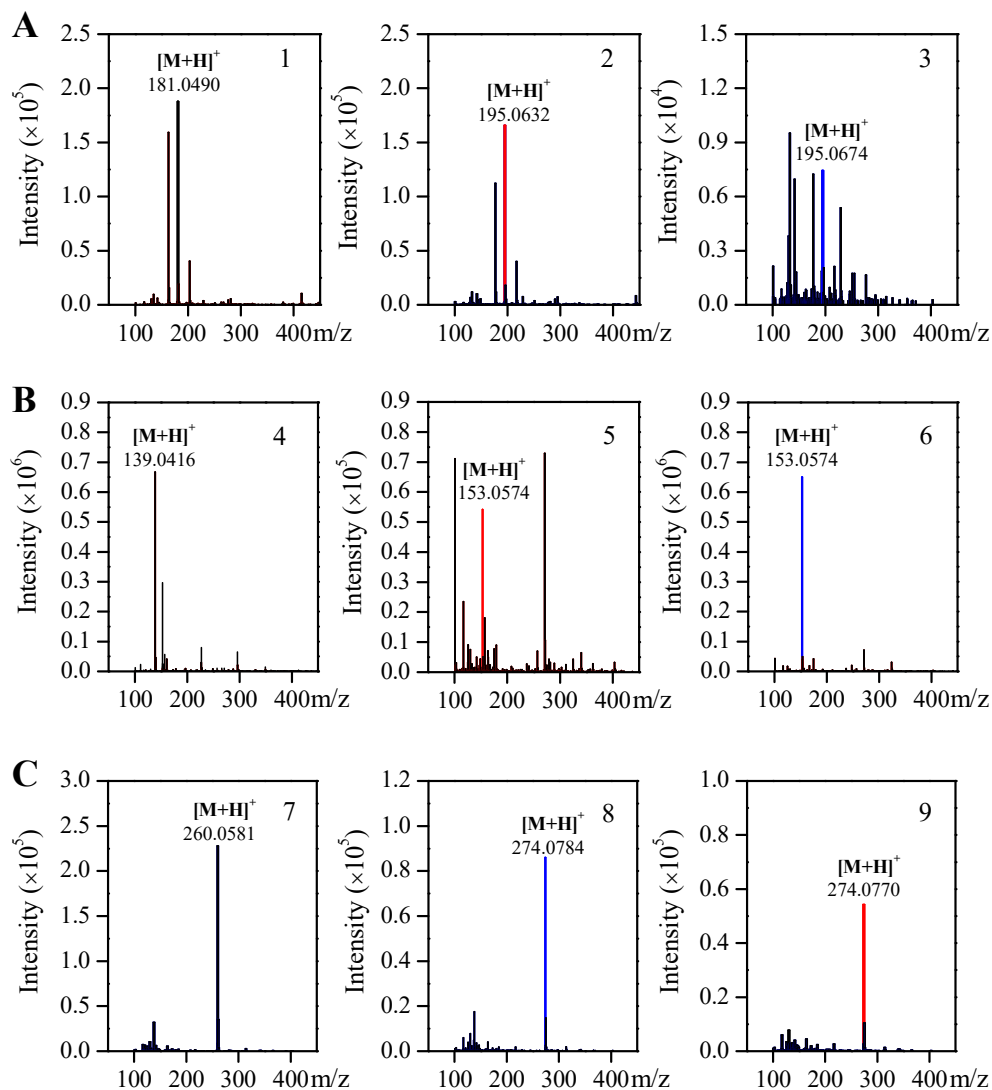

**Figure S4.** Measurement of the  $K_m$  and  $V_{max}$  of LaOMT1 for substrate caffeic acid.

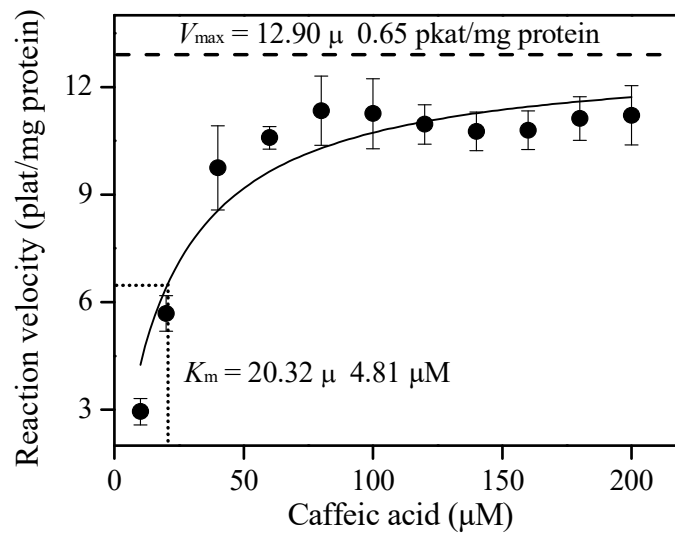

**Figure S5.** Measurement of the  $K_m$  and  $V_{max}$  of LaOMT1 for substrate 3,4-dihydroxybenzaldehyde.

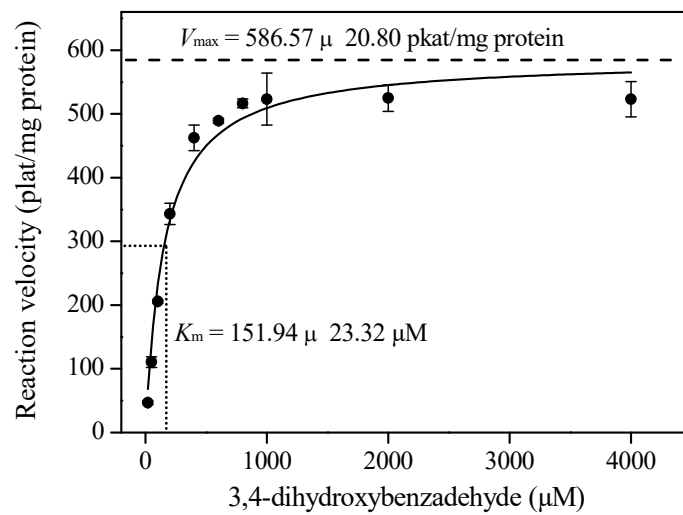

Supplement: ijms-19-01911-s001.pdf [file ijms-19-01911-s001.pdf]
